# Supplementary material
Source: publisher figshare collection journal article supplement (https://karger.figshare.com/ndownloader/files/14065391)
Supplement: Supplementary file 1 [file 14065391]

**Supplemental Table 5**

| **SNP Effect** | | | | | | | | | |
| --- | --- | --- | --- | --- | --- | --- | --- | --- | --- |
| **Gene** | **rsID** | **Trait** | **Meta-analysis Beta** | **Meta-analysis Std. Err.** | **Meta-analysis P value** | **EA Beta** | **AfAn Beta** | **EA Sample Size** | **AfAn Sample Size** |
| *FGF23* | rs11063112 | PTH | -7.17 | 3.77 | 0.06 | -8.83 | 1.41 | 1,024 | 383 |
| *FGF23* | rs11063112 | FGF23 | 5.24 | 7.12 | 0.46 | 5.22 | 15.30 | 861 | 326 |
| *FGF23* | rs11063112 | Phosphate | 0.13 | 3.70 | 0.97 | -2.60 | 5.14 | 1,000 | 383 |
| *FGF23* | rs11063112 | Calcium | 0.10 | 0.51 | 0.84 | 0.14 | -0.07 | 1,001 | 383 |
| *FGF23* | rs13312789 | PTH | -6.04 | 4.34 | 0.16 | -6.91 | -1.99 | 1,027 | 383 |
| *FGF23* | rs13312789 | FGF23 | -10.82 | 10.46 | 0.30 | -10.97 | 23.68 | 864 | 326 |
| *FGF23* | rs13312789 | Phosphate | 0.24 | 3.76 | 0.95 | -2.44 | 5.52 | 1,003 | 383 |
| *FGF23* | rs13312789 | Calcium | -0.59 | 0.73 | 0.42 | -0.67 | -0.33 | 1,004 | 383 |
|  | | | | | | | | | |
| **SNP X Treatment Interaction Effect** | | | | | | | | | |
| **Gene** | **rsID** | **Trait** | **Meta-analysis Beta** | **Meta-analysis Std. Err.** | **Meta-analysis P value** | **EA beta** | **AfAn Beta** | **EA Sample Size** | **AfAn Sample Size** |
| *FGF23* | rs11063112 | PTH | 8.10 | 3.95 | 0.04 | 8.72 | 3.08 | 1,024 | 383 |
| *FGF23* | rs11063112 | FGF23 | -5.82 | 9.33 | 0.53 | -5.51 | -115.45 | 861 | 326 |
| *FGF23* | rs11063112 | Phosphate | -1.84 | 5.11 | 0.72 | 2.02 | -8.61 | 1,000 | 383 |
| *FGF23* | rs11063112 | Calcium | -1.19 | 0.67 | 0.08 | -1.09 | -1.77 | 1,001 | 383 |
| *FGF23* | rs13312789 | PTH | 8.20 | 5.81 | 0.16 | 9.09 | 3.25 | 1,027 | 383 |
| *FGF23* | rs13312789 | FGF23 | 8.12 | 13.75 | 0.55 | 8.62 | -120.13 | 864 | 326 |
| *FGF23* | rs13312789 | Phosphate | -3.91 | 7.11 | 0.58 | 1.82 | -12.74 | 1,003 | 383 |
| *FGF23* | rs13312789 | Calcium | -0.84 | 0.98 | 0.39 | -0.87 | -0.73 | 1,004 | 383 |

Meta-analysis results for percent change phenotypes. SNP = Single Nucleotide Polymorphism. SNP effect indicates main SNP effect on each trait. SNP X Treatment Interaction Effect indicates SNP by Treatment (Placebo/Cinacalcet) interaction effect on each trait. Gene name (Gene), reference SNP ID number (rsID), Percentage change in serum concentrations between baseline and 20 week follow-up (Trait), Meta-analysis beta, standard error (std. err.) and p value, beta estimates among EA and AfAn samples (EA Beta, AfAn Beta), and sample sizes (EA sample size, AfAn sample size). EA= European Ancestry, AfAn= African Ancestry.
